# Supplementary material
Source: publisher figshare collection journal article supplement (https://gsajournals.figshare.com/articles/dataset/_/8792594)
Supplement: Supplementary file 1 [file 1]

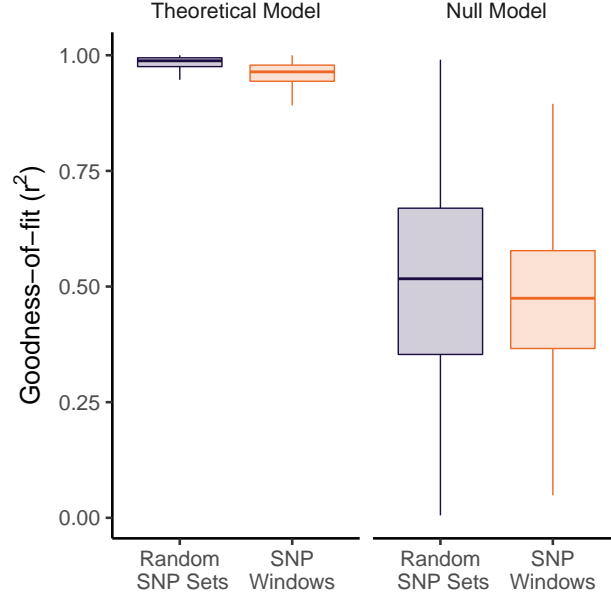

**Figure S2. Distribution of  $r^2$  values from linear regressions for observed values of  $F_{ST}$  against theoretical or null values, for random SNP sets and for SNP windows.** Each of the four columns shows a distribution across 10,000 trajectories. Whiskers extend to the largest and smallest observed  $r^2$  values no larger and smaller than 1.5 times the interquartile range above and below the median, respectively. Points beyond this range are omitted for clarity. Each of four Wilcoxon tests produces  $p < 2.2 \times 10^{-16}$  (paired tests for first vs. third column and second vs. fourth column; unpaired tests for first vs. second column and third vs. fourth column).
