# Supplementary material
Source: publisher figshare collection journal article supplement (https://gsajournals.figshare.com/articles/dataset/_/8792594)
Supplement: Supplementary file 2 [file 1]

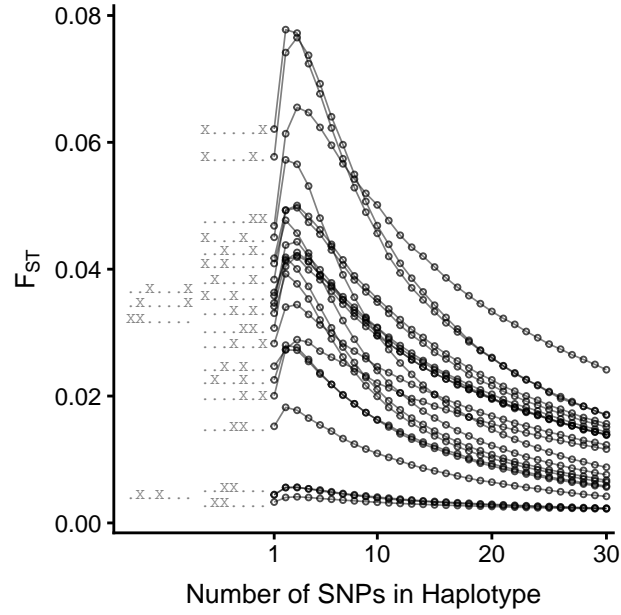

**Figure S4.**  $F_{ST}$  as a function of the number of SNPs in windows of neighboring SNPs, for pairs of geographic regions. Each of 21 pairs of regions is considered. Each point indicates the median of 10,000  $F_{ST}$  values, one for each of the 10,000 windows. Each pair of regions is indicated by a pattern of “.” and “X” symbols, with X indicating that a region is included. The left-to-right order of regions is Africa, Middle East, Europe, Central/South Asia, East Asia, Oceania, America. Thus, for example, .X...X. indicates the pair (Middle East, Oceania).
