# Supplementary material
Source: publisher figshare collection journal article supplement (https://gsajournals.figshare.com/articles/dataset/_/8792594)
Supplement: Supplementary file 3 [file 1]

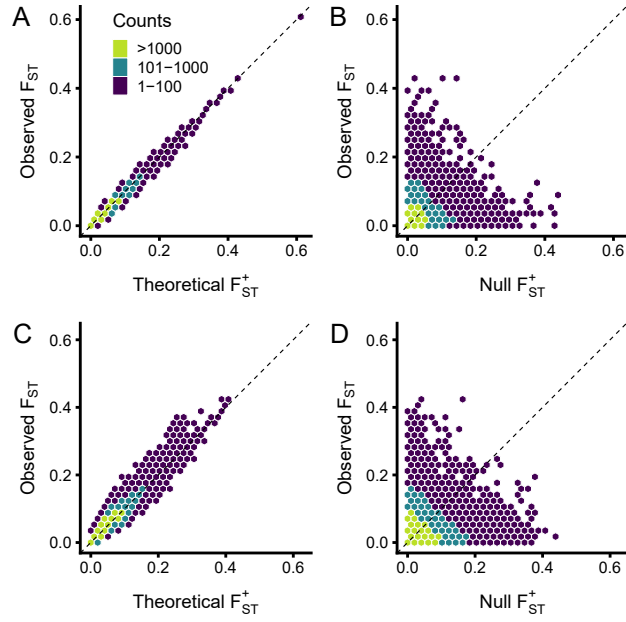

**Figure S1. Comparisons of observed  $F_{ST}$  to theoretical (eq. 20) and null values of  $F_{ST}^+$ , for both random SNP sets and SNP windows.** (A) Observed  $F_{ST}$  and theoretical  $F_{ST}^+$  for random SNP sets. (B) Observed  $F_{ST}$  and null  $F_{ST}^+$  for random SNP sets. (C) Observed  $F_{ST}$  and theoretical  $F_{ST}^+$  for SNP windows. (D) Observed  $F_{ST}$  and null  $F_{ST}^+$  for SNP windows. Each plot contains hexagonal bins of 290,000 data points: 10,000 SNP sets and 29 choices for the number of SNPs. Data presented here use Europe and East Asia as the two regions. The dashed line is the  $F_{ST} = F_{ST}^+$  line and indicates a perfect agreement between theoretical (or null) values and observed values.
